# Supplementary material
Source: PubMed Central journal article supplement (PMC6542612)
Supplement: jciinsight-4-127713-s157.pdf [file jciinsight-4-127713-s157.pdf]

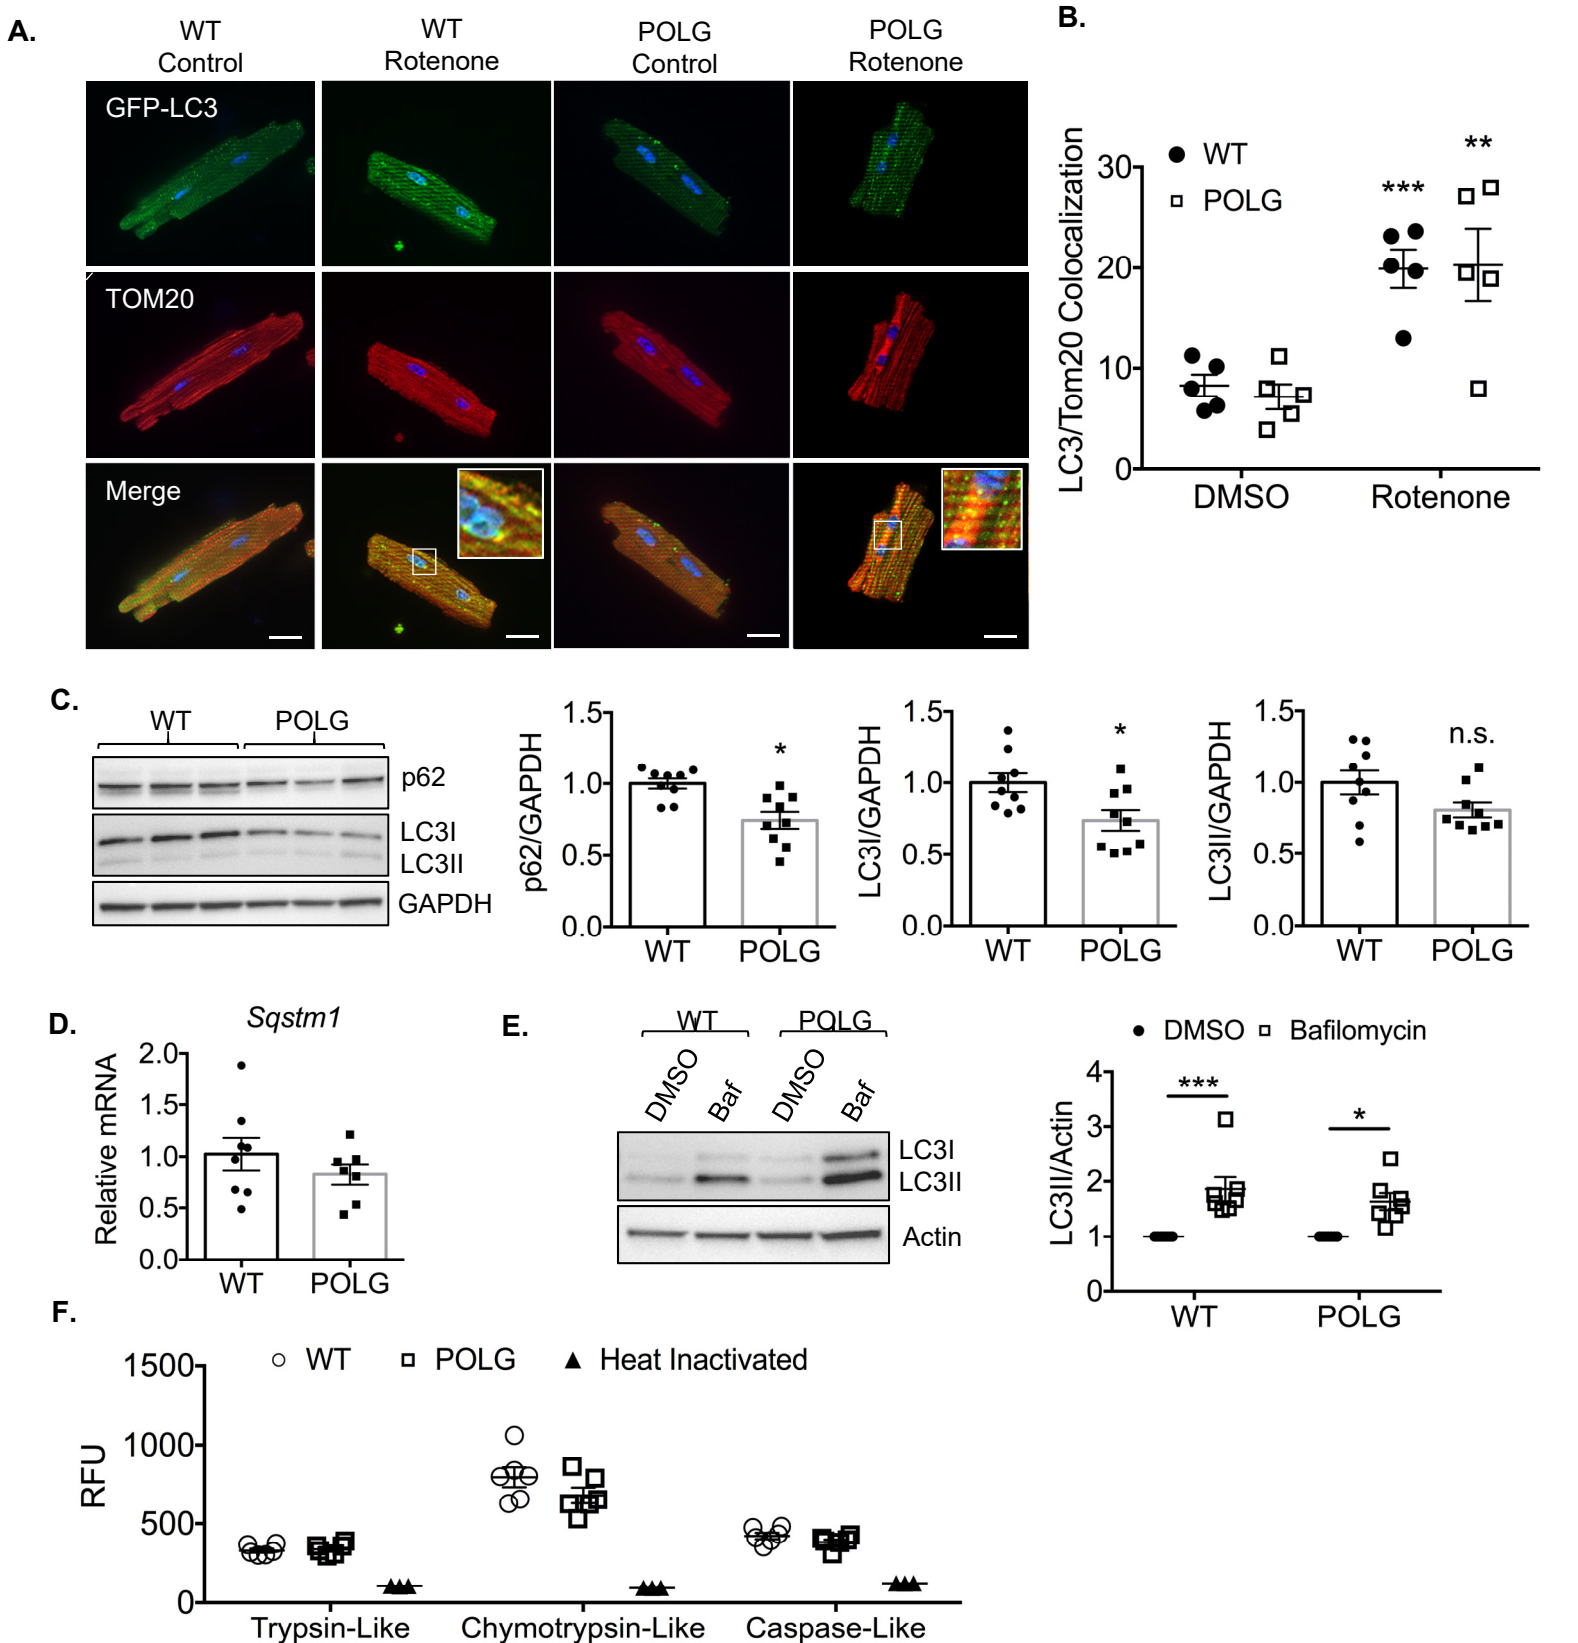

**Supplemental Figure 1.** Mitophagy and autophagic flux are intact in POLG myocytes. **A.** Representative images of myocytes treated with 40  $\mu$ M rotenone (ROT) for 60 min. Scale bar = 20  $\mu$ m. **B.** Quantitation of GFP-LC3 and Tom20 colocalizing puncta per myocyte (25-35 cells per condition was scored in each experiment,  $n=5$ ). **C.** Representative Western blot and quantitation of p62 and LC3 in whole heart lysates ( $n=9$ ). **D.** Real-time qPCR analysis of *p62* (*Sqstm1*) gene expression ( $n=7-8$ ). **E.** Representative Western blot and quantitation of LC3II in isolated adult mouse cardiomyocytes treated with 50nM bafilomycin (Baf) or vehicle control (DMSO) for 18 hours to assess autophagic flux ( $n=7$ ). **F.** Proteasomal activity in WT and POLG hearts at 6 months ( $n=6$ ). Data are mean  $\pm$  SEM (\* $p<0.05$ ; \*\* $p<0.01$ ; \*\*\* $p<0.001$ ; n.s., not significant). Statistical significance was calculated using Student's t-test or ANOVA followed by Dunnett's test for multiple comparison.

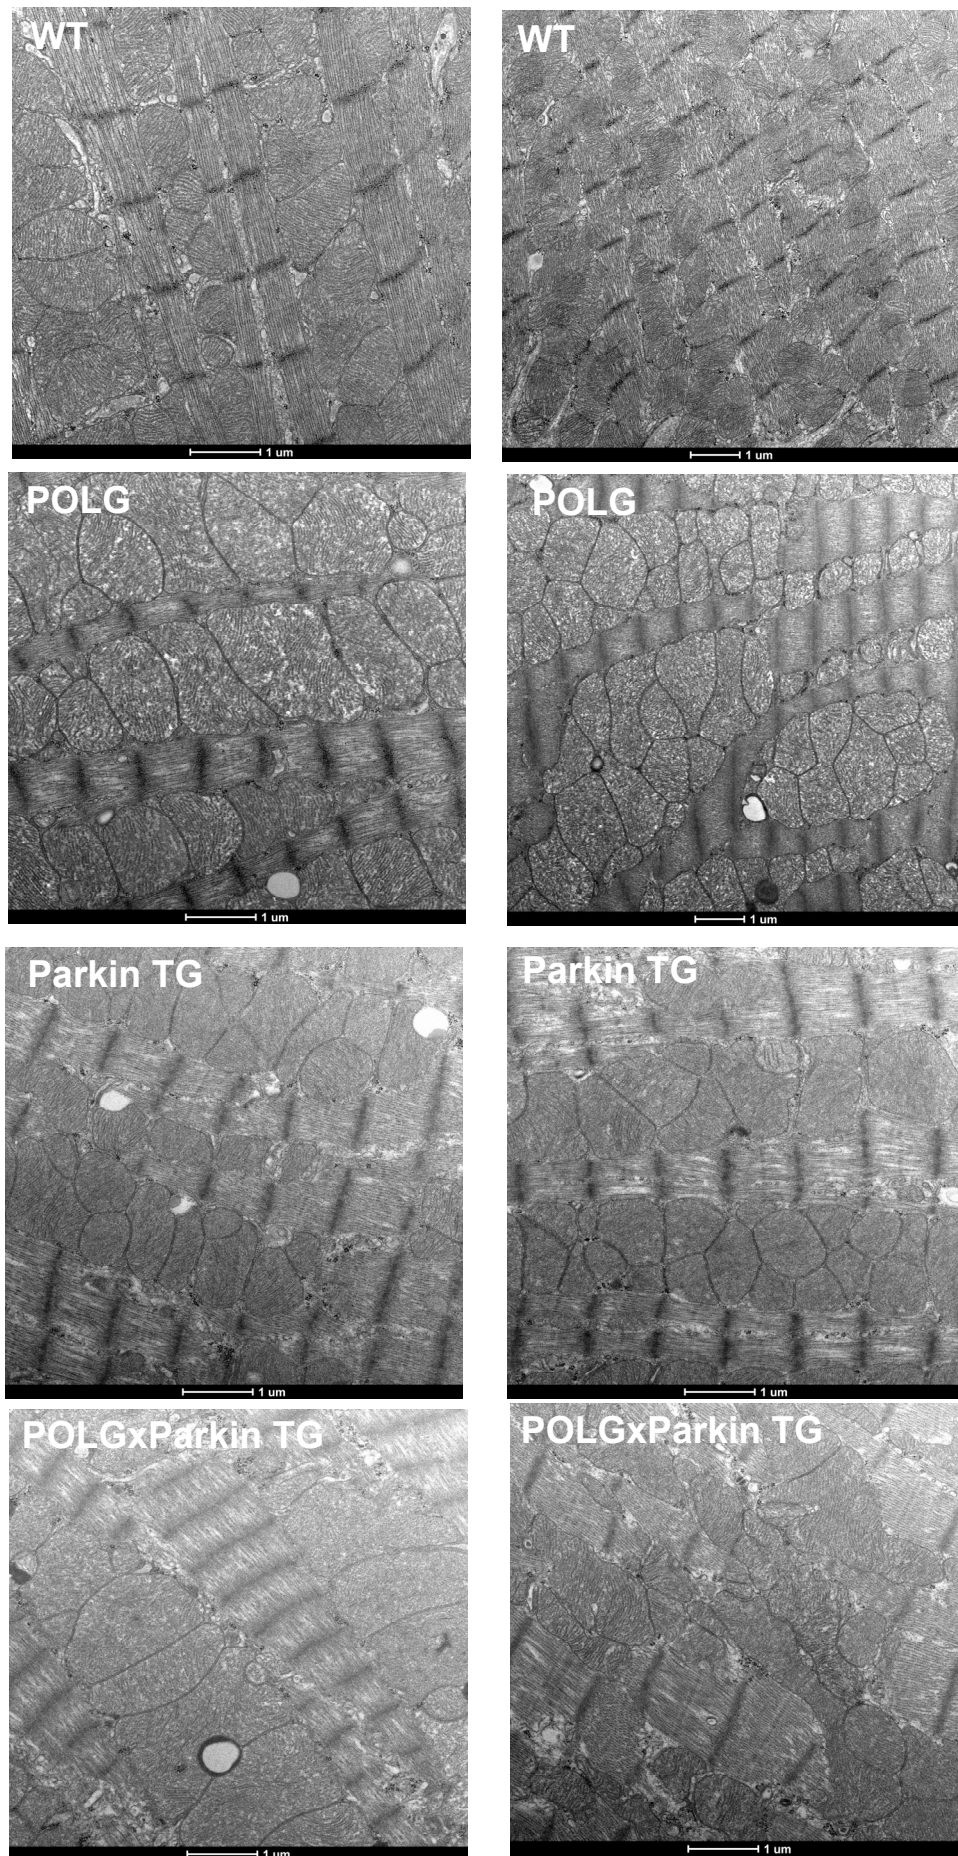

**Supplemental Figure 2.** Representative electron micrographs of aged hearts.
